## A NEW *IN VITRO* ASSAY FOR CARBON DIOXIDE EXCRETION BY TROUT RED BLOOD CELLS: EFFECTS OF CATECHOLAMINES

BY CHRIS M. WOOD\* AND STEVE F. PERRY II

*Department of Biology, University of Ottawa, 30 George Glinski, Ottawa, Ontario, Canada, K1N 6N5*

*Accepted 21 January 1991*

### Summary

A new *in vitro* assay was developed and critically characterized to measure the rate of CO<sub>2</sub> excretion by trout red blood cells (RBCs) from HCO<sub>3</sub><sup>−</sup> in their natural plasma under normal *in vivo* conditions of acid–base status. The assay is based on the addition of [<sup>14</sup>C]bicarbonate to the whole blood and collection of the resultant <sup>14</sup>CO<sub>2</sub> in the overlying gas phase. The assay simulates the exposure of blood passing through the gills, and measured CO<sub>2</sub> excretion rates are representative of those occurring *in vivo*. Rates are linear over the 3 min time course of the assay, related to haematocrit in a non-linear fashion, elevated by the addition of carbonic anhydrase, reduced by blockade with acetazolamide, and sensitive to variations of equilibration *P*<sub>CO<sub>2</sub></sub>. Large variations in plasma [HCO<sub>3</sub><sup>−</sup>] have only a small effect on CO<sub>2</sub> excretion rates when the blood is chronically equilibrated at these levels. Acute elevations in [HCO<sub>3</sub><sup>−</sup>], however, create a non-equilibrium situation, resulting in large increases in CO<sub>2</sub> excretion. When the blood is acidified, to duplicate typical post-exercise metabolic acidosis, adrenaline causes a marked inhibition of RBC CO<sub>2</sub> excretion. The response is transient, reaching a peak 5–8 min after addition of adrenaline and disappearing by 30–60 min. The magnitude of the adrenergic inhibition is correlated with the magnitude of the RBC p*H*<sub>i</sub> regulatory response, expressed as the RBC transmembrane pH difference (p*H*<sub>e</sub>–p*H*<sub>i</sub>). These results support the ‘CO<sub>2</sub> retention theory’ explaining observed increases in blood *P*<sub>CO<sub>2</sub></sub> *in vivo* after exhaustive exercise and catecholamine infusions in fish.

### Introduction

Carbon dioxide excretion at the gills of teleost fish follows the standard vertebrate scheme whereby (i) plasma HCO<sub>3</sub><sup>−</sup> enters the red blood cell (RBC) in electroneutral exchange for Cl<sup>−</sup>; (ii) the HCO<sub>3</sub><sup>−</sup> is dehydrated to CO<sub>2</sub> by

\* Permanent address: Department of Biology, McMaster University, 1280 Main Street West, Hamilton, Ontario, Canada L8S 4K1.

Key words: *Oncorhynchus mykiss*, red blood cell, carbon dioxide, adrenaline, intracellular pH, CO<sub>2</sub> excretion, bicarbonate dehydration.

erythrocytic carbonic anhydrase; and (iii) the resultant  $\text{CO}_2$  diffuses from the RBC through the plasma and respiratory epithelium to the external environment (reviewed by Perry, 1986; Perry and Laurent, 1990). The flux is driven by the  $P_{\text{CO}_2}$  gradient from RBC to water. However, after strenuous exercise, fish routinely exhibit large increases in  $P_{\text{aCO}_2}$  without a corresponding decrease in  $P_{\text{aO}_2}$  (e.g. Turner *et al.* 1983; Milligan and Wood, 1986; McDonald *et al.* 1989). The response is curious because a decrease in  $P_{\text{aO}_2}$  would be expected if the phenomenon were due to a simple diffusive or convective limitation on gas exchange. To explain this observation, several years ago we proposed that the mobilization of catecholamines into the acidotic bloodstream after exhaustive exercise produces an inhibition of the  $\text{HCO}_3^-$  entry step, thereby causing  $\text{CO}_2$  to back-up in the system until the rise in  $P_{\text{CO}_2}$  is sufficient to restore the flux (Wood and Perry, 1985).

Since that time, this 'CO<sub>2</sub> retention theory' has proved controversial. On the one hand, chronic intra-arterial infusions of adrenaline have been shown to cause simultaneous elevations of  $P_{\text{aCO}_2}$  and  $P_{\text{aO}_2}$  (Perry and Vermette, 1987; Vermette and Perry, 1988) and intra-arterial injections of carbonic anhydrase have been shown to reduce the post-exercise increase in  $P_{\text{aCO}_2}$  without altering  $P_{\text{aO}_2}$  (Perry and Wood, 1989). On the other hand, neither Steffensen *et al.* (1987) nor Playle *et al.* (1990) were able to demonstrate a transient fall in relative rate of carbon dioxide production ( $\dot{M}_{\text{CO}_2}$ ) (i.e. a decrease in the respiratory exchange ratio, RE) after exercise or catecholamine injections, in contrast to the predictions of the theory. Furthermore, Tufts *et al.* (1988) were unable to replicate a key observation on which the theory was based, namely that catecholamines cause an inhibition of  $\text{CO}_2$  excretion by intact trout RBCs *in vitro*.

Both the original observation (unpublished data of S. F. Perry and T. A. Heming presented by Wood and Perry, 1985) and the contrasting results of Tufts *et al.* (1988) were based on modifications of the manometric 'boat' assay for carbonic anhydrase, first used for RBCs by Booth (1938). In the assay, the RBCs are exposed to unphysiological buffer systems and pH values, and massive  $\text{HCO}_3^-$  pulses. Booth concluded that it was impossible to use this assay to measure  $\text{CO}_2$  excretion rates in intact erythrocytes, and over the years its use for that purpose with fish RBCs has been plagued with controversy (e.g. Haswell and Randall, 1976; Obaid *et al.* 1979; Cameron, 1978; Heming and Randall, 1982). Unfortunately, other available methods involve similar disturbances, such as the use of artificial buffers, large pulses of acid or base, filtration separation of the RBCs, cell lysis or the addition of carbonic anhydrase to the extracellular fluid (e.g. Dirken and Mook, 1931; Piiper, 1969; Lambert and Lowe, 1978; Crandall *et al.* 1978; Maren and Couto, 1979). We therefore decided that an entirely different approach was required, one in which net  $\text{CO}_2$  excretion from the unmodified plasma through the intact RBCs could be quantified under conditions closely approximating those *in vivo*.

In the present paper we describe and characterize a sensitive new method, based on the use of [<sup>14</sup>C]bicarbonate, for measuring net  $\text{CO}_2$  excretion by trout RBCs in their normal plasma *in vitro*. The  $P_{\text{CO}_2}$  gradients and acid-base conditions are

similar to those encountered by blood passing through the gills *in vivo*. Using this technique, we have confirmed the adrenergic inhibition of RBC  $\text{CO}_2$  excretion, and identified the conditions under which it occurs. The companion paper (Perry *et al.* 1991) presents a detailed analysis of the mechanism of this inhibition.

## Materials and methods

### *Experimental animals*

Rainbow trout [*Oncorhynchus mykiss* (Walbaum); 150–400 g] of either sex were obtained from Thistle Springs Trout Farm (Ashton, Ontario). Fish were maintained indoors in large rectangular fibreglass tanks supplied with flowing, vigorously aerated, dechlorinated City of Ottawa tapwater ( $[\text{Na}^+] = 0.12 \text{ mmol l}^{-1}$ ;  $[\text{Cl}^-] = 0.15 \text{ mmol l}^{-1}$ ;  $[\text{K}^+] = 0.03 \text{ mmol l}^{-1}$ ; pH 7.5–8.0; temperature 9–12°C; photoperiod 12 h light:12 h dark). Fish were fed daily *ad libitum* on floating commercial trout pellets (Purina), but were not fed for 48 h prior to experimental procedures.

To avoid endogenously elevated catecholamine and lactate levels, all blood was drawn from chronically cannulated fish. Trout were anaesthetized in a 1:10 000 (w/v) solution of ethyl-*m*-aminobenzoate (MS 222; Sigma) adjusted to pH 7.5 with  $\text{NaHCO}_3$  and then placed onto an operating table which permitted continuous retrograde perfusion of the gills. An indwelling cannula (Clay-Adams PE 50) filled with modified Cortland saline ( $[\text{HCO}_3^-] = 5 \text{ mmol l}^{-1}$ ; Wolf, 1963) was implanted into the dorsal aorta (Soivio *et al.* 1975). After surgery, fish were placed in darkened Perspex boxes (volume 3 l) served with continuously flowing acclimation water at the experimental temperature ( $10 \pm 1^\circ\text{C}$ ). Fish were allowed to recover for at least 48 h after surgery before blood sampling. Cannulae were flushed daily with 0.2–0.3 ml of heparinized saline (10 i.u.  $\text{ml}^{-1}$  ammonium heparin; Sigma).

### *Sampling and handling of blood*

Trout were initially infused with 0.5 ml of heparinized (50 i.u.  $\text{ml}^{-1}$ ) saline; blood was then withdrawn slowly until the fish showed the first signs of struggling or disorientation, at which point sampling ceased. This procedure generally yielded 2–3 ml per fish, though occasionally large trout yielded up to 5 ml. Depending on the size of the experiment, blood from at least three, and up to 12, fish was pooled, additionally heparinized (150 i.u.  $\text{ml}^{-1}$ ), and stored on ice for 1–2 h prior to use. At this point, the pooled blood was routinely assayed for whole-blood pH (pHe=7.8–8.0), true plasma carbon dioxide content ( $C_{\text{CO}_2} = 4\text{--}6 \text{ mmol l}^{-1}$ ), plasma catecholamines (adrenaline plus noradrenaline always below  $7 \text{ nmol l}^{-1}$ ) and haematocrit (15–25 %).

In preparation for the  $\text{CO}_2$  excretion assay, the pooled heparinized blood was split into 1.0 ml samples in individual 20 ml glass scintillation vials. In experiments where haematocrit or plasma  $\text{HCO}_3^-$  levels (long-term changes) were manipulated, the adjustments were performed immediately prior to the splitting. For the

former, the pooled blood was very lightly centrifuged (500 g for 1 min), and an appropriate volume of homologous plasma added or removed. Plasma was also obtained in this fashion for 'plasma only' assays. Adjustments of plasma  $[\text{HCO}_3^-]$  were performed by very gradual additions of  $140 \text{ mmol l}^{-1}$  HCl or  $140 \text{ mmol l}^{-1}$   $\text{NaHCO}_3$  to whole blood, care being taken to avoid haemolysis. Addition of  $140 \text{ mmol l}^{-1}$  NaCl served as a control. The vials were then stoppered with rubber septa, gas-equilibrated in an open, flow-through system, as described by Walsh *et al.* (1990), and shaken for 2 h in a constant-temperature bath at  $10 \pm 1^\circ\text{C}$ . The normal gassing medium was a humidified mixture with  $P_{\text{CO}_2} = 0.25 \text{ kPa}$  (1.91 mmHg),  $P_{\text{O}_2} = 20.7 \text{ kPa}$  (155 mmHg), balance  $\text{N}_2$  provided by a Wösthoff model M301a/f gas-mixing pump. This  $P_{\text{CO}_2}$  was virtually identical to resting  $P_{\text{aCO}_2}$  measured in the same batch of trout (Wood *et al.* 1990). Gas equilibration was continued until the start of the  $\text{CO}_2$  excretion assay.

#### *The $\text{CO}_2$ excretion assay*

The assay is illustrated diagrammatically in Fig. 1, and is based on the addition of  $^{14}\text{C}$  bicarbonate to the whole blood (i.e. to the extracellular compartment) and collection of the resultant  $^{14}\text{CO}_2$  in the overlying gas phase. Theoretically, this  $^{14}\text{CO}_2$  may be generated by two routes: (i) dehydration of  $^{14}\text{C}$  bicarbonate in the plasma (presumably at the uncatalysed rate); and (ii) dehydration of  $^{14}\text{C}$  bicarbonate in the RBCs (presumably catalysed by erythrocytic carbonic anhydrase) subsequent to entry *via*  $\text{Cl}^-/\text{HCO}_3^-$  exchange. The net  $\text{CO}_2$  flux is driven by the  $P_{\text{CO}_2}$  gradients between the respective blood compartments and the gas phase. The blood is initially equilibrated to normal *in vivo*  $P_{\text{CO}_2}$ , but in the assay vial it is exposed to a gas phase in which  $P_{\text{CO}_2}$  is close to zero, owing to the presence of a  $\text{CO}_2$  trap; the situation is similar to that of blood passing through the gills, where the external water  $P_{\text{CO}_2}$  is close to zero.

In practice,  $2 \mu\text{Ci}$  ( $10 \mu\text{l}$  of  $200 \mu\text{Ci ml}^{-1}$ ) of sodium  $^{14}\text{C}$  bicarbonate (in  $5 \text{ mmol l}^{-1}$   $\text{HCO}_3^-$  Cortland saline) was added to each 1 ml of pre-equilibrated blood (or plasma). The vial was then immediately resealed with a new rubber septum from which was suspended a plastic well containing a trap for  $\text{CO}_2$  (Fig. 1; Walsh *et al.* 1988), returned to the shaker bath, and timing commenced. Assays were routinely run for exactly 3 min. The trap consisted of a fluted filter paper (Whatman GF/A 2.4 cm glass microfibre filter) impregnated with  $150 \mu\text{l}$  of  $1 \text{ mol l}^{-1}$  hyamine hydroxide in methanol. At the termination of the assay, the filter was immediately removed and assayed for  $^{14}\text{C}$  activity, and the blood drawn into a Hamilton gas-tight syringe. Whole blood (or plasma) pHe was measured, and the remaining blood immediately centrifuged ( $12\,000 \text{ g}$  for 2 min). The plasma was decanted anaerobically for  $C_{\text{CO}_2}$  determination ( $100 \mu\text{l}$ ) and  $^{14}\text{C}$  counting ( $50 \mu\text{l}$ ); the packed red cell pellet was frozen in liquid  $\text{N}_2$  for later determination of RBC pHi by the freeze-thaw lysate method (Zeidler and Kim, 1977).

The  $\text{CO}_2$  excretion rate for each assay vial was calculated by dividing filter paper  $^{14}\text{C}$  activity by plasma specific activity and time. Note that specific activity was measured at the end, rather than at the start, of the assay. The calculated rate was

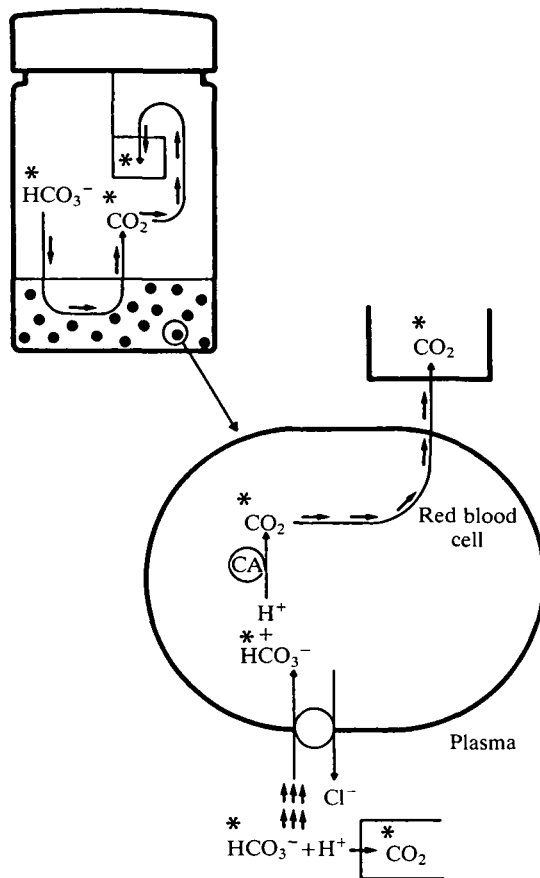

Fig. 1. Diagrammatic representation of the  $\text{CO}_2$  excretion assay. Radioactive [ $^{14}\text{C}$ ]bicarbonate (marked with \*) is added to the whole blood (i.e. extracellular compartment) and  $^{14}\text{CO}_2$  is collected in the gas-phase trap. The inset shows the pathway of  $^{14}\text{CO}_2$  flux through a single red blood cell (RBC) and surrounding plasma. Excreted  $^{14}\text{CO}_2$  collected in the trap may originate either from uncatalysed dehydration in the plasma (minor pathway) or from dehydration in the RBC catalysed by erythrocytic carbonic anhydrase (CA) subsequent to entry *via*  $\text{Cl}^-/\text{HCO}_3^-$  exchange (major pathway). See text for additional details.

then corrected for the efficiency of  $\text{CO}_2$  trapping by the hyamine hydroxide filter. Trapping efficiency was measured over a wide range of  $\text{CO}_2$  evolution rates by acidifying various 1 ml  $\text{HCO}_3^-$  standards ( $^{14}\text{C}$ -labelled, in plasma) with 100  $\mu\text{l}$  of 35 %  $\text{HClO}_3$ , and then running the assay for 3 min. Trapping efficiency was always 74 %, regardless of the  $\text{CO}_2$  evolution rate.

The following drugs were used in various tests: acetazolamide sodium U.S.P (Diamox; Lederle); bovine erythrocytic carbonic anhydrase (2500 Wilbur-Anderson units per mg; Sigma) (1 Wilbur-Anderson unit causes the pH of 0.012 mol  $\text{l}^{-1}$  veronal to drop from 8.3 to 6.3 in 1 min at  $0^\circ\text{C}$ ); L-adrenaline

bitartrate (Sigma); and L-noradrenaline bitartrate (Sigma). Drug additions to the assay vials were made in 50  $\mu\text{l}$  samples of 140  $\text{mmol l}^{-1}$  NaCl, the vehicle alone being added to control vials.

#### *Analytical procedures*

Haematocrit was determined by centrifuging 80  $\mu\text{l}$  of blood in a heparinized capillary tube for 10 min at 5000  $g$ . RBC pHi and pHe (whole blood or plasma) were determined with a micro-capillary pH electrode (G299A) thermostatted to the experimental temperature in a BMS3 Mk2 blood micro-system, and displayed on a PHM-71 acid-base analyzer (all Radiometer). Plasma  $C_{\text{CO}_2}$  was determined in a few early experiments by the method of Cameron (1971), and in later experiments using a Corning 965  $\text{CO}_2$  analyzer. Plasma  $P_{\text{CO}_2}$  and  $[\text{HCO}_3^-]$  were calculated using the Henderson-Hasselbalch equation and appropriate constants listed in Boutilier *et al.* (1984). Adrenaline and noradrenaline levels were determined on alumina-extracted plasma samples using high performance (pressure) liquid chromatography with electrochemical detection according to the method of Woodward (1982).

Plasma and filter paper  $^{14}\text{C}$  activities were determined by liquid scintillation counting (LKB Rackbeta) and automatic quench correction. Plasma (50  $\mu\text{l}$ ) was counted in 10 ml of commercial cocktail (ACS II; Amersham), and filter papers in 10 ml of a customized cocktail containing 2.0 g of PPO plus 0.1 g of POPOP dissolved in 0.8 l of toluene plus 0.2 l of 95 % ethanol.

#### *Statistical analyses*

Results are reported as means  $\pm$  1 s.e.m. ( $N$ ), or representative experiments, as appropriate. Significant differences were detected using factorial analysis of variance followed by Fisher's LSD multiple-comparison test; 5 % was taken as the fiducial limit of significance.

### **Results**

#### *Time course of the assay*

Initial trials were run at a range of assay durations. The cumulative  $\text{CO}_2$  excretion of whole blood increased in an almost linear fashion with time up to about 10 min, and thereafter deviated only gradually from linearity (Fig. 2A). This basic linearity up to 10 min was seen both in tests run with the endogenous  $\text{HCO}_3^-$  levels in the equilibrated blood (about 5  $\text{mmol l}^{-1}$ ) and in tests where the plasma  $[\text{HCO}_3^-]$  was acutely doubled at the start of the assay so as to elevate the  $\text{CO}_2$  excretion rates (see below).

Fig. 2B illustrates the change in acid-base status of the blood plasma over time in the assay, as measured at the immediate termination of each run. The  $P_{\text{CO}_2}$  fell progressively and plasma  $[\text{HCO}_3^-]$  declined as  $\text{CO}_2$  was excreted. The trap kept the gas-phase  $P_{\text{CO}_2}$  close to zero, so the fall in blood  $P_{\text{CO}_2}$  reflected equilibration with the gas-phase. When plotted on a pH- $\text{HCO}_3^-$  diagram, the change in

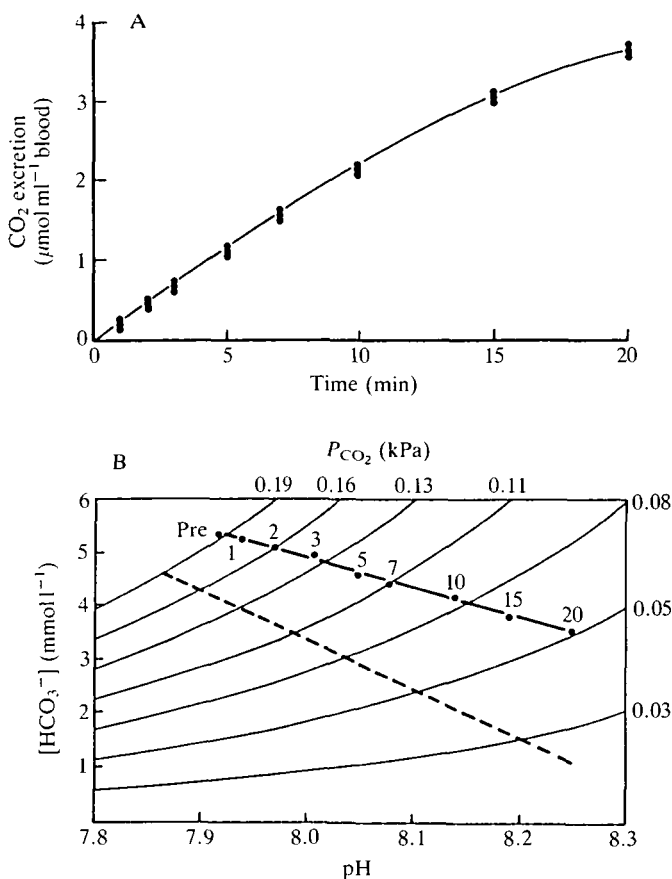

Fig. 2. (A) Representative experiment showing the time course of  $\text{CO}_2$  excretion in the assay system. Triplicate assays were run on a common pool of trout blood (haematocrit=20%) over various durations ranging from 1 to 20 min. (B) A pH- $\text{HCO}_3^-$  diagram displaying the mean acid-base status of true plasma measured immediately at the end of the assay for each time point in the same experiment. The non- $\text{HCO}_3^-$  buffer line (dashed,  $\beta=9.2 \text{ mequiv l}^{-1} \text{ pH unit}^{-1}$ ) for this haematocrit, based on the relationship of Wood *et al.* (1982), is included for reference.

acid-base status virtually paralleled the non- $\text{HCO}_3^-$  buffer line, confirming that it was due to  $P_{\text{CO}_2}$  decline alone. The decrease in  $P_{\text{CO}_2}$  gradient from blood to air (the net driving force for the  $\text{CO}_2$  excretion process) undoubtedly contributed to the slight deviation from linearity at longer durations. The efficiency tests demonstrated that it was not due to saturation of the trap. Based on these results, a standard assay duration of 3 min, in the strictly linear region, was selected for all further trials.

#### Validation tests

The rate of  $\text{CO}_2$  excretion increased with haematocrit in tests run at both endogenous and acutely elevated levels of plasma  $[\text{HCO}_3^-]$  (Fig. 3). The increase

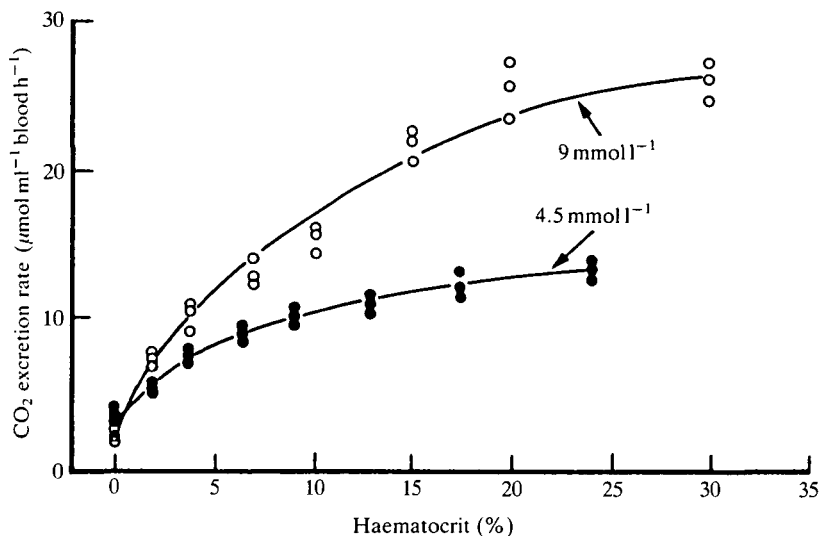

Fig. 3. The effects of haematocrit and of acute elevations in plasma  $[\text{HCO}_3^-]$  on the  $\text{CO}_2$  excretion rate of trout whole blood. Triplicate assays were run on pools of blood made up to different haematocrits by removal or addition of homologous plasma. In the lower curve, the blood was equilibrated at control  $P_{\text{CO}_2}$  with endogenous plasma  $\text{HCO}_3^-$  concentration ( $4.5 \text{ mmol l}^{-1}$ ) for 2 h prior to assay. In the upper curve, the blood was equilibrated under the same conditions for 2 h. However, at the immediate start of the assay, the  $[\text{HCO}_3^-]$  was acutely doubled by addition of  $10 \mu\text{l}$  of  $472 \text{ mmol l}^{-1} \text{ NaHCO}_3$ .

was not directly proportional to haematocrit, but tended to attenuate at higher RBC levels. At a normal haematocrit of 25 % and normal blood acid–base status (plasma  $[\text{HCO}_3^-] = 5 \text{ mmol l}^{-1}$ ,  $\text{pHe} = 7.9$ ), the  $\text{CO}_2$  excretion rate of the whole blood was about  $14 \mu\text{mol ml}^{-1} \text{ h}^{-1}$  or about 5 times the rate of true plasma.

The addition of 0.2 mg of bovine carbonic anhydrase (500 Wilbur-Anderson units) to 1 ml of true plasma raised its  $\text{CO}_2$  excretion rate to a value slightly greater than that of whole blood (Fig. 4). The addition of  $10^{-4} \text{ mol l}^{-1}$  acetazolamide (Diamox) either to whole blood or to plasma plus carbonic anhydrase lowered their  $\text{CO}_2$  excretion rates back to those of plasma alone. Finally, as a check that catecholamines did not affect carbonic anhydrase activity directly,  $10^{-6} \text{ mol l}^{-1}$  adrenaline was added to plasma plus carbonic anhydrase. The  $\text{CO}_2$  excretion rate remained equal to that of plasma plus carbonic anhydrase alone. From these tests we conclude that the assay is responsive to changes in  $\text{CO}_2$  excretion mediated either by the erythrocytes or by artificial intervention, and that the plasma rate can be subtracted from the whole blood rate to yield the rate of  $\text{CO}_2$  excretion mediated by the RBCs alone.

#### *The influence of plasma $[\text{HCO}_3^-]$ and $P_{\text{CO}_2}$*

The effects of alterations in plasma  $[\text{HCO}_3^-]$  at constant  $P_{\text{CO}_2}$  differed greatly, depending on whether the blood had been pre-equilibrated at the various  $\text{HCO}_3^-$

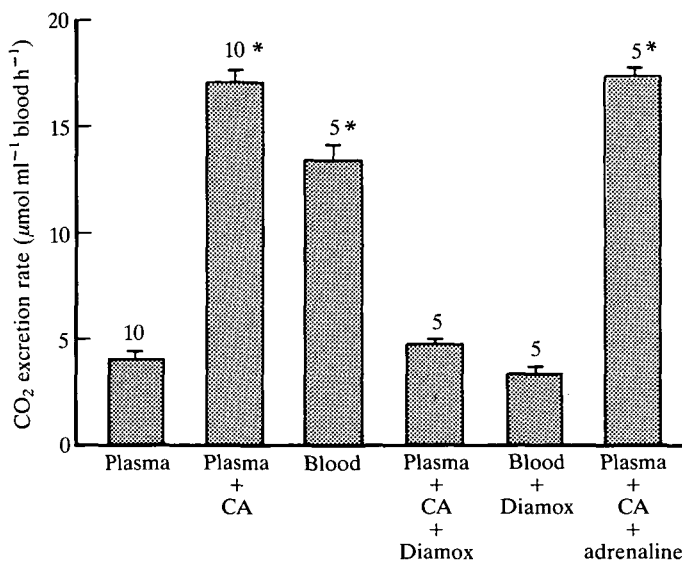

Fig. 4.  $\text{CO}_2$  excretion rates in rainbow trout plasma, plasma plus 0.2 mg of bovine carbonic anhydrase (CA), whole blood (mean haematocrit=24%), plasma plus carbonic anhydrase plus  $10^{-4} \text{ mol l}^{-1}$  acetazolamide (Diamox), whole blood plus Diamox, and (vi) plasma plus carbonic anhydrase plus  $10^{-6} \text{ mol l}^{-1}$  adrenaline, all at control acid-base status. Drugs were added at least 1 h prior to assay. Means  $\pm$  1 S.E.M., *N*. Asterisks indicate means significantly different from plasma value ( $P < 0.05$ ).

levels or exposed to acute changes. Fig. 5 illustrates an experiment where the plasma  $\text{HCO}_3^-$  levels were adjusted by addition of  $\text{HCl}$  or  $\text{NaHCO}_3$ , and then the blood was equilibrated at a normal  $P_{\text{CO}_2}$  for 2 h prior assay. Under these circumstances, the  $\text{CO}_2$  excretion rate was markedly unresponsive to the plasma  $\text{HCO}_3^-$  concentration. Indeed, over a 45-fold range in  $[\text{HCO}_3^-]$  ( $0.6$ – $27.3 \text{ mmol l}^{-1}$ ), and accompanying 1.9 unit increase in  $\text{pHe}$ , the whole-blood  $\text{CO}_2$  excretion rate increased by only 35%. Within a more physiological range of plasma  $\text{HCO}_3^-$  concentrations ( $2$ – $12 \text{ mmol l}^{-1}$ ) there was no detectable effect in several experiments.

In contrast, the RBC  $\text{CO}_2$  excretion rate was very responsive to acute changes in plasma  $[\text{HCO}_3^-]$ , as illustrated by Fig. 3. Here the plasma  $[\text{HCO}_3^-]$  was abruptly elevated at the start of the assay from the equilibration level of  $4.5 \text{ mmol l}^{-1}$  to  $9.0 \text{ mmol l}^{-1}$  (at normal  $P_{\text{CO}_2}$ ), thereby creating a non-equilibrium situation. RBC  $\text{CO}_2$  excretion rate increased in almost direct proportion to the rise in plasma  $[\text{HCO}_3^-]$ , and the response was related to the haematocrit.

The  $\text{CO}_2$  excretion rate was also very responsive to the  $P_{\text{CO}_2}$  to which the blood had been equilibrated prior to assay. The data of Table 1 are from four separate experiments with pools of blood of slightly different haematocrits. Nevertheless, it is clear that increases in the equilibration  $P_{\text{CO}_2}$  greatly elevated the  $\text{CO}_2$  excretion rate. Quantitative interpretation was complicated by the fact that the greater the

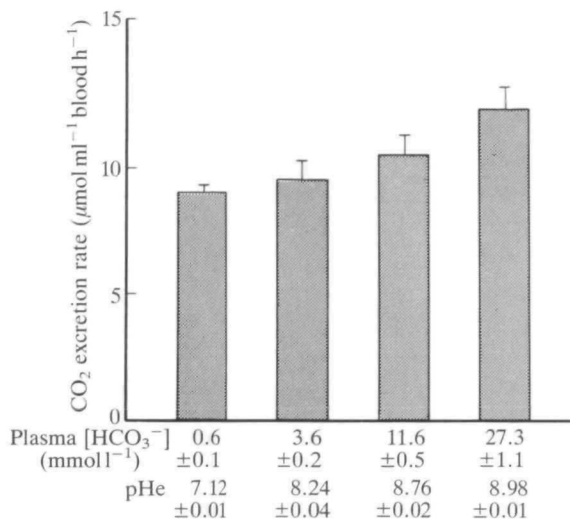

Fig. 5. The effects of chronic adjustments of plasma  $\text{HCO}_3^-$  concentration on the  $\text{CO}_2$  excretion rate of trout whole blood (mean haematocrit=25%). Plasma  $[\text{HCO}_3^-]$  was adjusted by addition of  $140 \text{ mmol l}^{-1} \text{ HCl}$  or  $140 \text{ mmol l}^{-1} \text{ NaHCO}_3$  (with appropriate balancing volumes of  $140 \text{ mmol l}^{-1} \text{ NaCl}$ ), followed by at least 2 h of equilibration at control  $P_{\text{CO}_2}$  prior to assay. Acid-base status was measured at the immediate end of each assay. Means  $\pm 1 \text{ S.E.M.}$  ( $N=4-5$ ). Only rates at the lowest and highest  $[\text{HCO}_3^-]$  are significantly different from one another ( $P<0.05$ ).

Table 1. *The influence of the equilibration of  $P_{\text{CO}_2}$  on the  $\text{CO}_2$  excretion rates of whole blood*

| $P_{\text{CO}_2}^*$<br>(kPa) | Haematocrit<br>(%) | $\text{CO}_2$ excretion rate $^\dagger$<br>( $\mu\text{mol ml}^{-1} \text{ blood h}^{-1}$ ) |
|------------------------------|--------------------|---------------------------------------------------------------------------------------------|
| 0.05                         | 17.5               | $6.31 \pm 0.33$ (4)                                                                         |
| 0.25                         | 17.5               | $14.64 \pm 1.19$ (6)                                                                        |
| 1.00                         | 23.3               | $24.97 \pm 2.52$ (5)                                                                        |
| 1.50                         | 21.1               | $49.00 \pm 2.30$ (5)                                                                        |

Values are mean  $\pm 1 \text{ S.E.M.}$  ( $N$ ).

\* Experiments were performed on different pools of blood at each  $P_{\text{CO}_2}$ ; the blood was equilibrated to the relevant  $P_{\text{CO}_2}$  for at least 2 h prior to assay.

$^\dagger$  The rates at each  $P_{\text{CO}_2}$  were all significantly different from one another ( $P<0.05$ ).

starting  $P_{\text{CO}_2}$ , the greater was the fall in  $P_{\text{CO}_2}$  during the 3 min assay, so this subject was not pursued further.

#### *The influence of catecholamines*

In a series of preliminary experiments run at normal acid-base status, the addition of adrenaline or noradrenaline ( $10^{-8}$ – $10^{-6} \text{ mol l}^{-1}$ ) to the blood

30–120 min prior to assay had small and inconsistent effects on  $\text{CO}_2$  excretion rates. In general, the effects were inhibitory, but they were neither consistent nor statistically significant in most trials. However, *in vivo* the inhibitory effect after strenuous exercise is hypothesized to occur at the time of catecholamine mobilization, which is also a time of severe metabolic acidosis (see Introduction). Furthermore, recent studies on another trout RBC response, the regulation of RBC  $\text{pHi}$  via adrenergic activation of  $\text{Na}^+/\text{H}^+$  exchange, have shown that this phenomenon becomes markedly sensitized at acidotic  $\text{pHe}$  values (see Discussion). Therefore, an experiment was performed to evaluate the possible time-dependency of both the RBC  $\text{pHi}$  and  $\text{CO}_2$  excretion responses, using blood acidified to about  $\text{pH}$  7.4 with  $\text{HCl}$  to simulate the metabolic acidosis component ( $\Delta\text{H}_m^+=7\text{ mmol l}^{-1}$ ) recorded in trout immediately after exhaustive exercise (Turner *et al.* 1983; Milligan and Wood, 1986).

Under these conditions, adrenaline ( $10^{-6}\text{ mol l}^{-1}$ ) caused a rapid rise (0.1 unit) in RBC  $\text{pHi}$  and fall (0.4 unit) in  $\text{pHe}$ , measured 3 min after addition (Fig. 6C,D). The peak  $\text{pHi}$  response occurred at 3 min, and the peak  $\text{pHe}$  response at 8 min, after which both declined. By 33 and 63 min, the  $\text{pHi}$  effect had disappeared, though the fall in  $\text{pHe}$  was still highly significant.

Adrenaline ( $10^{-6}\text{ mol l}^{-1}$ ) had no immediate effect on RBC  $\text{CO}_2$  excretion rate (measured 0–3 min after addition; Fig. 6A). However, by 5–8 min,  $\text{CO}_2$  excretion rate had declined significantly by 35 %, coincident with the maximum reduction in  $\text{pHe}-\text{pHi}$ . At 15–18 min, the inhibition, while still significant, had attenuated to 12 %. At 30–33 min and 60–63 min there was no longer any significant effect, despite the persistence of  $\text{pHe}$  depression. The cumulative influence of inhibited  $\text{CO}_2$  excretion was clearly reflected in the plasma  $\text{C}_{\text{CO}_2}$  levels measured at the end of each 3 min assay (Fig. 6B).

These results indicated that adrenaline caused a clear, though transient, inhibition of RBC  $\text{CO}_2$  excretion under acidotic conditions. The results further suggested that the effect might in some way be associated with the  $\text{pHe}-\text{pHi}$  response. All subsequent experiments were performed with similarly acidified blood ( $\text{pHe}=7.40\pm0.02$ ,  $[\text{HCO}_3^-]=1.90\pm0.07\text{ mmol l}^{-1}$  at  $P_{\text{CO}_2}=0.25\text{ kPa}$ ), with assays conducted at 5–8 min after catecholamine addition. Both adrenaline and noradrenaline caused a concentration-dependent reduction in  $\text{pHe}-\text{pHi}$  over the range  $10^{-8}$ – $10^{-6}\text{ mol l}^{-1}$ . In individual samples (treated with either catecholamine at  $10^{-8}$ – $10^{-6}\text{ mol l}^{-1}$  or a control saline addition) there was a highly significant correlation ( $r=0.76$ ,  $P<0.001$ ,  $N=62$ ) between  $\text{pHe}-\text{pHi}$  and the RBC  $\text{CO}_2$  excretion rate (Fig. 7). The greater the effect of catecholamines on  $\text{pHe}-\text{pHi}$ , the greater was the inhibition of  $\text{CO}_2$  excretion.

## Discussion

### *The $\text{CO}_2$ excretion assay*

$[^{14}\text{C}]$ bicarbonate-based techniques are widely used in algal physiology for

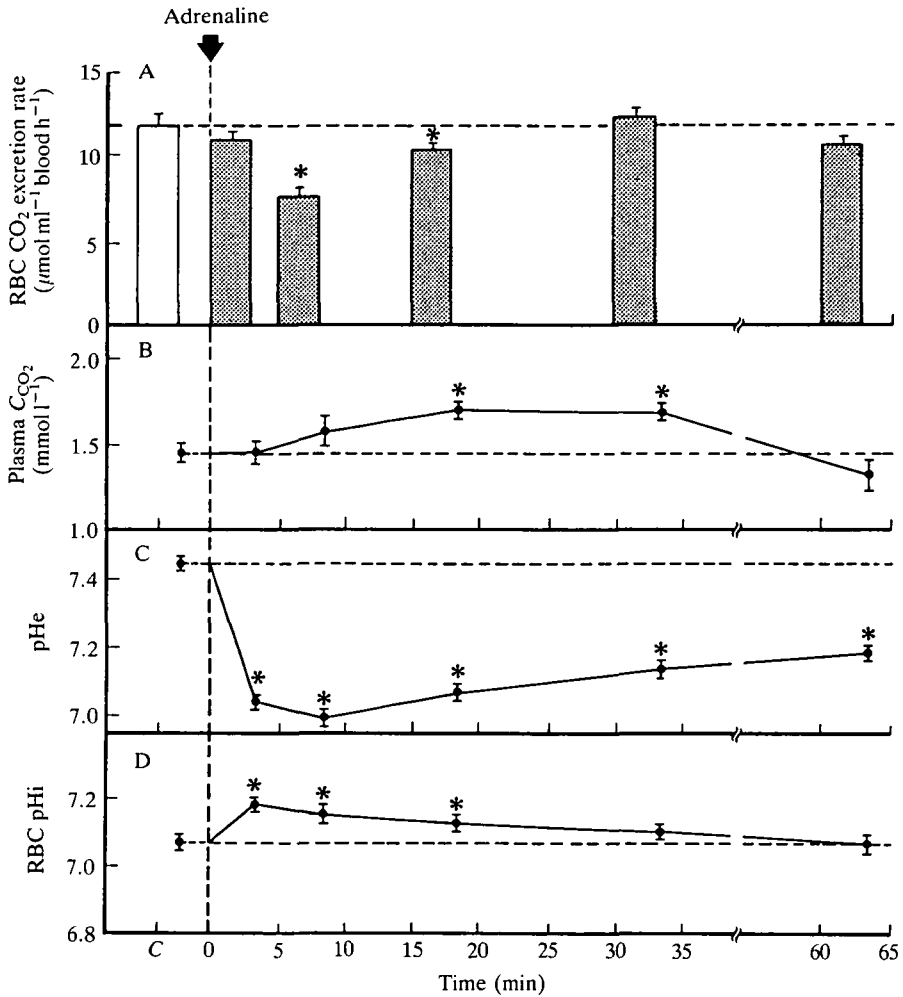

Fig. 6. The time-dependent effects of addition of adrenaline ( $10^{-6} \text{ mol l}^{-1}$ ) to acidified blood (mean haematocrit = 21 %) on (A) red blood cell (RBC) CO<sub>2</sub> excretion rate; (B) true plasma total CO<sub>2</sub> content; (C) extracellular pH; and (D) red blood cell intracellular pH. Adrenaline was added at time 0, and assays were run before addition (C), and at 0–3 min, 5–8 min, 15–18 min, 30–33 min and 60–63 min after addition. Acid-base status was measured at the immediate end of each assay. Means  $\pm$  1 S.E.M. ( $N=5$ ). Asterisks indicate means significantly different ( $P<0.05$ ) from the pre-adrenaline control.

assessing the role of carbonic-anhydrase-mediated  $\text{HCO}_3^-$  dehydration in photosynthesis (e.g. Tsuzuki *et al.* 1980; Shiraiwa and Miyachi, 1985). However, to our knowledge, they have not previously been used to monitor analogous processes in vertebrate RBCs. In developing a new *in vitro* assay for RBC CO<sub>2</sub> excretion, our prime concerns were that the assay be sensitive and reproducible, that the assay conditions be as representative of the *in vivo* situation as possible, and that the

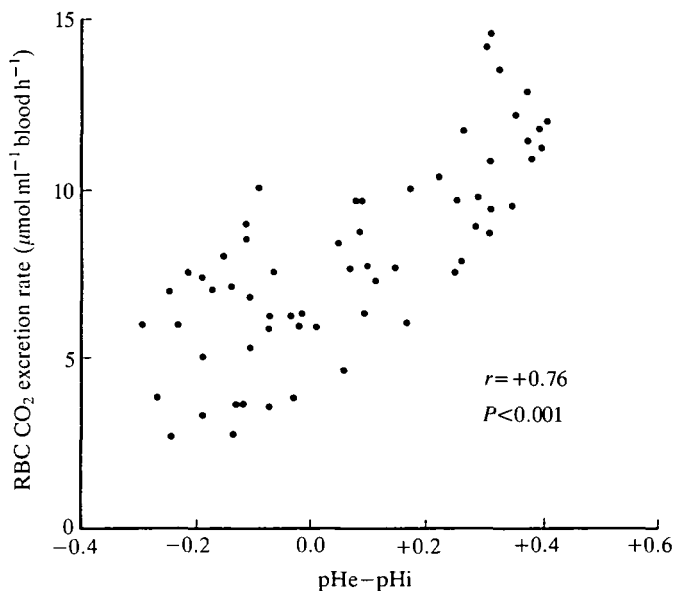

Fig. 7. Correlation between red blood cell (RBC)  $\text{CO}_2$  excretion rate and the RBC transmembrane pH gradient ( $\text{pHe} - \text{pHi}$ ) in 62 acidified blood samples treated with various doses ( $10^{-8}$ – $10^{-6} \text{ mol l}^{-1}$ ) of adrenaline or noradrenaline or  $140 \text{ mmol l}^{-1}$  NaCl. Rates were measured 5–8 min after addition, and the  $\text{pHe} - \text{pHi}$  gradients were measured at the immediate end of each assay.

assay should yield rates that are physiologically realistic. The present assay fulfills all three criteria.

By virtue of the use of radiotracer, the assay can measure rates in 3 min or less with a coefficient of variation ( $\text{CV} = \text{s.d.}/\text{mean}$ ) generally less than 10 % for multiple assays run on a common pool. In our experience, the largest source of error is the accuracy of timing with respect to insertion and removal of the  $\text{CO}_2$  trap. When particular care is taken with this step, the CV can be reduced below 5 %. In contrast to other techniques (see Introduction), the assay is run with intact RBCs in their normal plasma (i.e. whole blood) under *in vivo* conditions of  $\text{pHe}$ ,  $P_{\text{CO}_2}$  and plasma  $[\text{HCO}_3^-]$ . The exposure to a gas phase of zero  $P_{\text{CO}_2}$  simulates the conditions encountered by blood as it passes through the gills. At a normal haematocrit of 25 %, the  $\text{CO}_2$  excretion rate of whole blood in the assay at  $10^\circ\text{C}$  was about  $14 \mu\text{mol ml}^{-1} \text{ h}^{-1}$ . Assuming a normal resting cardiac output of  $18 \text{ ml kg}^{-1} \text{ min}^{-1}$  for the rainbow trout at this temperature (Cameron and Davis, 1970; Kiceniuk and Jones, 1977), the estimated whole-animal  $\dot{M}_{\text{CO}_2}$  would be about  $15 \text{ mmol kg}^{-1} \text{ h}^{-1}$ . Measured *in vivo*  $\dot{M}_{\text{CO}_2}$  was about 20 % of this figure (Wright *et al.* 1986; Lin and Randall, 1990). Given the nature of the extrapolation, the probable greater diffusion barriers *in vivo* (e.g. unstirred layers) and the fact that the equilibrating water  $P_{\text{CO}_2}$  cannot be truly zero *in vivo*, owing to regional ventilation–perfusion mismatch, the agreement is not unreasonable.

We cannot entirely eliminate the possibility that there is some component of

diffusion limitation in the present assay. However, given the fact that the  $\text{CO}_2$  excretion rate of whole blood in the assay appeared to be somewhat higher, rather than lower, than *in vivo* rates, this is unlikely to be a serious problem. The assay can measure experimentally induced elevations in rate well above normal control levels (e.g. Table 1, Fig. 3), as well as inhibitions below control levels (Figs 6, 7; Perry *et al.* 1991). We have also used the assay to measure large changes in  $\text{CO}_2$  excretion rate of blood resulting from changes in the physiological condition of the fish from which the blood was sampled (C. M. Wood, unpublished results).

It is of interest to compare the performance of the present assay with that of the 'boat' assay, which has been commonly employed until now for trout blood (Haswell and Randall, 1976; Heming and Randall, 1982; Tufts *et al.* 1988). The boat assay itself can be run in as little as 1 min, but only after a 3–10 min settling period for initial pressure equilibration. As  $\text{CO}_2$  is evolved into the gas phase, the back-pressure on the system progressively rises, so the assay quickly becomes non-linear. The influence of this back-pressure at the gas/fluid interface probably contributes to the foaming artefact reported to block  $\text{CO}_2$  excretion by some workers (Haswell and Randall, 1976; Heming and Randall, 1982), but not by others (Tufts *et al.* 1988) when the assay is run with plasma or whole blood. The coefficient of variation has not been reported, but would appear to be about 10 % based on recalculation of published data. The most serious drawback of the boat assay is that the acid–base status of the sample is grossly perturbed. The blood is initially incubated in a pH 6.8 phosphate buffer ( $\text{HCO}_3^-$ -free and  $\text{Cl}^-$ -free) followed by acute exposure to  $100 \text{ mmol l}^{-1} \text{ NaHCO}_3$  plus  $10 \text{ mmol l}^{-1} \text{ NaOH}$ . Normal plasma is no longer present, pH and  $P_{\text{CO}_2}$  must be greatly altered, and substrate concentration ( $[\text{HCO}_3^-]$ ) is suddenly dramatically elevated. In the light of the present findings on the effects of acute  $\text{HCO}_3^-$  elevation on RBC  $\text{CO}_2$  excretion rates (Fig. 3, discussed below), it is not surprising that the  $\text{CO}_2$  excretion rate reported for trout blood of 25 % haematocrit by Tufts *et al.* (1988) was about  $1000 \mu\text{mol ml}^{-1} \text{ h}^{-1}$ , 70 times greater than the present values and 350 times greater than *in vivo* rates.

#### *Factors affecting RBC $\text{CO}_2$ excretion*

In the light of the large amounts of carbonic anhydrase normally present in erythrocytes (Maren, 1967; Perry and Laurent, 1990), it was initially surprising that whole-blood  $\text{CO}_2$  excretion rates were only about fivefold higher than plasma rates. Nevertheless, this is in accord with findings of the boat assay for trout blood when wetting agents were used to overcome the foaming artefact (Heming and Randall, 1982), and also with the haematocrit *versus*  $\dot{M}_{\text{CO}_2}$  relationship established by Perry *et al.* (1982) *in vivo*. The presence of large amounts of carbonic anhydrase in the RBCs is not expressed as vastly elevated whole-blood  $\text{CO}_2$  excretion rates relative to that of plasma. This is because the rate of net  $\text{HCO}_3^-$  entry into the RBCs (*via*  $\text{Cl}^-/\text{HCO}_3^-$  exchange), rather than carbonic anhydrase activity itself, is thought to be the rate-limiting step in  $\text{CO}_2$  excretion (Perry, 1986).

Nevertheless, if this were the only factor involved, we would expect a linear

relationship between haematocrit and  $\text{CO}_2$  excretion rate, whereas this clearly did not occur (Fig. 3). Instead, rates tended to saturate at higher haematocrits. The only other examination of this relationship in fish blood, by Tufts *et al.* (1988) using the boat assay, found exactly the opposite, a virtually exponential increase with haematocrit (the rate increased more than eightfold as haematocrit rose from 10 to 30 %). Although it is difficult to account for such an exponential relationship, there are several possible explanations for the saturating relationship seen in the present study.

One obvious possibility is substrate limitation – i.e. depletion of plasma  $[\text{HCO}_3^-]$  over the course of the assay by the greater number of RBCs. However, this appears to be unlikely, because measured plasma  $\text{HCO}_3^-$  levels at the end of the 3 min assay were essentially the same at all haematocrits within a pool. In any event, under equilibrium conditions the blood  $\text{CO}_2$  excretion rate was only marginally dependent on plasma  $[\text{HCO}_3^-]$  (Fig. 5). A more likely explanation is some sort of physical blocking phenomenon associated with more concentrated RBCs – e.g. interference with substrate access to  $\text{Cl}^-/\text{HCO}_3^-$  exchange sites, a greater volume occupied by unstirred layers on the RBC surfaces, viscosity effects on convective mixing or lower diffusion rates through the RBCs or at the gas phase/blood interface (Gros and Moll, 1971; Klocke, 1988). It would be interesting to know whether such effects occur *in vivo* or are an artefact of the assay conditions.

The dependence of the  $\text{CO}_2$  excretion rate on the pre-equilibration  $P_{\text{CO}_2}$  of the blood (Table 1) was the expected result, since the  $P_{\text{CO}_2}$  gradient from RBC to gas phase provides the net driving force for the  $\text{CO}_2$  excretion process in the assay, as *in vivo*. The relative independence of the  $\text{CO}_2$  excretion rate from the pre-equilibration plasma  $[\text{HCO}_3^-]$  (Fig. 5), but its sensitivity to acutely altered plasma  $[\text{HCO}_3^-]$  (Fig. 3), is more interesting. In the blood of resting trout (i.e. no adrenergic stimulation) under equilibrium conditions,  $\text{HCO}_3^-$  and  $\text{Cl}^-$  (and  $\text{H}^+$ ) are probably passively distributed across the RBC membrane according to a Gibbs–Donnan equilibrium (Wood *et al.* 1982; Heming *et al.* 1986; Nikinmaa *et al.* 1987). Thermodynamically, there will be no driving force for net  $\text{HCO}_3^-$  entry, regardless of the plasma  $[\text{HCO}_3^-]$ , until the assay is actually started by exposure to a gas phase  $P_{\text{CO}_2}$  of zero, thereby lowering intracellular  $[\text{HCO}_3^-]$  by catalysed conversion to  $\text{CO}_2$ . At this point, the  $\text{HCO}_3^-$  distribution ratio will no longer be dictated by the membrane potential, and net  $\text{HCO}_3^-$  entry/ $\text{Cl}^-$  exit will occur because of the electrochemical disequilibrium. This disequilibrium will tend to be slightly greater with higher extracellular  $[\text{HCO}_3^-]$ , explaining the shallow dependence of  $\text{CO}_2$  excretion rate on plasma  $[\text{HCO}_3^-]$  (Fig. 5).

In contrast, when the plasma  $[\text{HCO}_3^-]$  is acutely raised at the start of the assay, the assay starts under non-equilibrium conditions. Immediately, there is a large driving force for net  $\text{HCO}_3^-$  entry, and the  $\text{CO}_2$  excretion rate is very sensitive to this non-equilibrium plasma  $\text{HCO}_3^-$  level (Fig. 3). This phenomenon undoubtedly accounts for the very high  $\text{CO}_2$  excretion rates in the boat assay (see above), where the blood is acutely exposed to  $100 \text{ mmol l}^{-1} \text{ NaHCO}_3$ .

*The influence of catecholamines on RBC CO<sub>2</sub> excretion*

When trout blood was acidified to simulate the metabolic acidosis normally seen after exhaustive exercise ( $\Delta H_m^+ = 7 \text{ mmol l}^{-1}$ ; Turner *et al.* 1983; Milligan and Wood, 1986), the addition of adrenaline or noradrenaline ( $10^{-8}$ – $10^{-6} \text{ mol l}^{-1}$ ) caused a clear inhibition of RBC CO<sub>2</sub> excretion (Figs 6, 7). This is in accord with the original observation (unpublished data of S. F. Perry and T. A. Heming presented by Wood and Perry, 1985), and supports the 'CO<sub>2</sub> retention theory'. The time course of the inhibitory effect (maximal at 5–8 min after catecholamine addition, persistent at 15–18 min and over by 30–60 min; Fig. 6) is not dissimilar to the time course of  $P_{a\text{CO}_2}$  elevation *in vivo* after exhaustive exercise in the rainbow trout (Wood and Perry, 1985).

The negative results of Tufts *et al.* (1988) are probably attributable to a combination of factors: the limitations of the boat assay discussed earlier, the transitory nature of the response (Fig. 6), and the general lack of response at normal blood pH (see also Perry *et al.* 1991, for additional data on this point). Our original reasons for tests at reduced pHe were three-fold: (i) this is the relevant situation *in vivo* when 'CO<sub>2</sub> retention' occurs; (ii) the original experiments of S. F. Perry and T. A. Heming (unpublished results) reported by Wood and Perry (1985) were conducted with trout RBCs in Cortland saline, which probably had a lower pHe; and (iii) it is now known that adrenergic activation of RBC Na<sup>+</sup>/H<sup>+</sup> exchange (the RBC pH<sub>i</sub> regulatory response) is markedly sensitized at acidotic pHe values (Nikinmaa *et al.* 1987; Borgese *et al.* 1987; Cossins and Kilbey, 1989; Milligan *et al.* 1989).

The magnitude of the inhibition of RBC CO<sub>2</sub> excretion by catecholamines was clearly correlated with the magnitude of the pHe–pH<sub>i</sub> response (Fig. 7). It is possible that the two responses share a common pathway, and there are theoretical reasons why the two could be mechanistically related. However, the time courses were certainly not identical (i.e. the pHe–pH<sub>i</sub> effect lasted long after the inhibition of RBC CO<sub>2</sub> excretion had disappeared; Fig. 6), and correlation (Fig. 7) does not prove causation. The mechanism of the inhibitory response is addressed in the subsequent paper (Perry *et al.* 1991).

This research was supported by NSERC operating and equipment grants to C.M.W. and S.F.P. We are grateful to Dr R. Motais for helpful discussions.

### References

- BOOTH, V. H. (1938). Carbonic anhydrase activity inside corpuscles. Enzyme–substrate accessibility factors. *J. Physiol., Lond.* **93**, 117–128.
- BORGESE, F., GARCIA-ROMEY, F. AND MOTAIS, R. (1987). Ion movements and volume changes induced by catecholamines in erythrocytes of rainbow trout. *J. Physiol., Lond.* **382**, 145–157.
- BOUTILIER, R. G., HEMING, T. A. AND IWAMA, G. K. (1984). Physico-chemical parameters for use in fish respiratory physiology. In *Fish Physiology*, vol. 10A (ed. W. S. Hoar and D. J. Randall), pp. 401–430. Academic Press: New York.
- CAMERON, J. N. (1971). Rapid method of determination of total carbon dioxide in small blood samples. *J. appl. Physiol.* **31**, 632–634.

- CAMERON, J. N. (1978). Chloride shift in fish blood. *J. exp. Zool.* **206**, 289–295.
- CAMERON, J. N. AND DAVIS, J. C. (1970). Gas exchange in rainbow trout (*Salmo gairdneri*) with varying blood oxygen capacity. *J. Fish. Res. Bd. Can.* **27**, 1069–1085.
- COSSINS, A. R. AND KILBEY, R. V. (1989). The seasonal modulation of  $\text{Na}^+/\text{H}^+$  exchanger activity in trout erythrocytes. *J. exp. Biol.* **144**, 463–478.
- CRANDALL, E. D., OBAID, A. L. AND FORSTER, R. E. (1978). Bicarbonate–chloride exchange in erythrocyte suspensions. Stopped-flow pH electrode measurements. *Biophys. J.* **24**, 35–42.
- DIRKEN, M. N. J. AND MOOK, H. W. (1931). The rate of gas exchange between blood cells and serum. *J. Physiol., Lond.* **73**, 349–360.
- GROS, G. AND MOLL, W. (1971). The diffusion of carbon dioxide in erythrocytes and hemoglobin solutions. *Pflügers Arch.* **324**, 249–266.
- HASWELL, M. S. AND RANDALL, D. J. (1976). Carbonic anhydrase inhibitor in trout plasma. *Respir. Physiol.* **28**, 17–27.
- HEMING, T. A. AND RANDALL, D. J. (1982). Fish erythrocytes are bicarbonate permeable: problems with determining carbonic anhydrase activity using the modified boat technique. *J. exp. Zool.* **219**, 125–128.
- HEMING, T. A., RANDALL, D. J., BOUTILIER, R. G., IWAMA, G. K. AND PRIMMETT, D. (1986). Ionic equilibria in red blood cells of rainbow trout (*Salmo gairdneri*):  $\text{Cl}^-$ ,  $\text{HCO}_3^-$ , and  $\text{H}^+$ . *Respir. Physiol.* **65**, 223–234.
- KICENIUK, J. W. AND JONES, D. R. (1977). The oxygen transport system in trout (*Salmo gairdneri*) during sustained exercise. *J. exp. Biol.* **69**, 247–260.
- KLOCKE, R. A. (1988). Velocity of  $\text{CO}_2$  exchange in blood. *A. Rev. Physiol.* **50**, 625–637.
- LAMBERT, A. AND LOWE, A. G. (1978). Chloride/bicarbonate exchange in human erythrocytes. *J. Physiol., Lond.* **275**, 51–63.
- LIN, H. AND RANDALL, D. J. (1990). The effect of varying water pH on the acidification of expired water in rainbow trout. *J. exp. Biol.* **149**, 149–160.
- MAREN, T. H. (1967). Carbonic anhydrase: chemistry, physiology, and inhibition. *Physiol. Rev.* **47**, 595–781.
- MAREN, T. H. AND COUTO, E. A. (1979). The nature of anion inhibition of human red cell carbonic anhydrase. *Archs Biochem. Biophys.* **196**, 501–510.
- MCDONALD, D. G., TANG, Y. AND BOUTILIER, R. G. (1989). The role of  $\beta$ -adrenoreceptors in the recovery from exhaustive exercise in freshwater-adapted trout. *J. exp. Biol.* **147**, 471–491.
- MILLIGAN, C. L., GRAHAM, M. S. AND FARRELL, A. P. (1989). The response of trout red cells to adrenaline during seasonal acclimation and changes in temperature. *J. Fish Biol.* **35**, 229–236.
- MILLIGAN, C. L. AND WOOD, C. M. (1986). Intracellular and extracellular acid–base status and  $\text{H}^+$  exchange with the environment after exhaustive exercise in the rainbow trout. *J. exp. Biol.* **123**, 93–121.
- NIKINMAA, M., STEFFENSEN, J. F., TUFTS, B. L. AND RANDALL, D. J. (1987). Control of red cell volume and pH in trout: effects of isoproterenol, transport inhibitors, and extracellular pH in bicarbonate/carbon dioxide-buffered media. *J. exp. Zool.* **242**, 273–281.
- OBAID, A. L., CRITZ, A. M. AND CRANDALL, E. D. (1979). Kinetics of bicarbonate/chloride exchange in dogfish erythrocytes. *Am. J. Physiol., Lond.* **237**, 132–138.
- PERRY, S. F. (1986). Carbon dioxide excretion in fishes. *Can. J. Zool.* **64**, 565–572.
- PERRY, S. F., DAVIE, P. S., DAXBOECK, C. AND RANDALL, D. J. (1982). A comparison of  $\text{CO}_2$  excretion in a spontaneously ventilating blood-perfused trout preparation and saline-perfused gill preparations: contribution of the branchial epithelium and red blood cell. *J. exp. Biol.* **101**, 47–60.
- PERRY, S. F. AND LAURENT, P. (1990). The role of carbonic anhydrase in carbon dioxide excretion, acid–base balance and ionic regulation in aquatic gill breathers. In *Transport, Respiration and Excretion: Comparative and Environmental Aspects* (ed. J. P. Truchot and B. Lahlou), pp. 39–57. Basel: Karger.
- PERRY, S. F. AND VERMETTE, M. G. (1987). The effects of prolonged epinephrine infusion on the physiology of rainbow trout, *Salmo gairdneri*. I. Blood respiratory, acid–base and ionic status. *J. exp. Biol.* **128**, 235–253.
- PERRY, S. F. AND WOOD, C. M. (1989). Control and coordination of gas transfer in fishes. *Can. J. Zool.* **67**, 2961–2970.
- PERRY, S. F., WOOD, C. M., THOMAS, S. AND WALSH, P. J. (1991). Adrenergic inhibition of

- carbon dioxide excretion by trout red blood cells *in vitro* is mediated by activation of  $\text{Na}^+/\text{H}^+$  exchange. *J. exp. Biol.* **157**, 367–380.
- PIPER, J. (1969). Rates of chloride-bicarbonate exchange between red cells and plasma. In *CO<sub>2</sub>: Chemical, Biochemical and Physiological Aspects*. NASA SP-188 (ed. R. Forster, J. T. Edsall, A. B. Otis and F. J. W. Roughton), pp. 267–273. Washington, D. C.
- PLAYLE, R. C., MUNGER, R. S. AND WOOD, C. M. (1990). Catecholamine effects on gas exchange and ventilation in rainbow trout (*Salmo gairdneri*). *J. exp. Biol.* **152**, 353–367.
- SHIRAIWA, Y. AND MIYACHI, S. (1985). Role of carbonic anhydrase in photosynthesis of blue green algae (Cyanobacterium) *Anabaena variabilis*. ATCC 29413. *Plant Cell Physiol.* **26**, 109–116.
- SOIVIO, A., NYHOLM, K. AND WESTMAN, K. (1975). A technique for repeated blood sampling of the blood of individual resting fish. *J. exp. Biol.* **62**, 207–217.
- STEFFENSEN, J. F., TUFTS, B. L. AND RANDALL, D. J. (1987). Effect of burst swimming and adrenaline infusion on O<sub>2</sub> consumption and CO<sub>2</sub> excretion in rainbow trout *Salmo gairdneri*. *J. exp. Biol.* **131**, 427–434.
- TSUZUKI, M., SHIRAIWA, Y. AND MIYACHI, S. (1980). Role of carbonic anhydrase in photosynthesis in *Chlorella* derived from kinetic analysis of <sup>14</sup>CO<sub>2</sub> fixation. *Plant and Cell Physiol.* **21**, 677–688.
- TUFTS, B. L., FERGUSON, R. A. AND BOULIER, R. G. (1988). *In vivo* and *in vitro* effects of adrenergic stimulation on chloride/bicarbonate exchange in rainbow trout erythrocytes. *J. exp. Biol.* **140**, 301–312.
- TURNER, J. D., WOOD, C. M. AND CLARK, D. (1983). Lactate and proton dynamics in the rainbow trout (*Salmo gairdneri*). *J. exp. Biol.* **104**, 247–268.
- VERMETTE, M. G. AND PERRY, S. F. (1988). Effects of prolonged epinephrine infusion on blood respiratory and acid–base status in the rainbow trout: Alpha and beta effects. *Fish Physiol. Biochem.* **4**, 189–202.
- WALSH, P. J., MOMMSEN, T. P., MOON, T. W. AND PERRY, S. F. (1988). Effects of acid–base variables on *in vitro* hepatic metabolism in rainbow trout. *J. exp. Biol.* **135**, 231–241.
- WALSH, P. J., WOOD, C. M., THOMAS, S. AND PERRY, S. F. (1990). Characterization of red blood cell metabolism in rainbow trout. *J. exp. Biol.* **154**, 475–489.
- WOLF, K. (1963). Physiological salines for freshwater teleosts. *Progve Fish. Cult.* **25**, 135–140.
- WOOD, C. M., McDONALD, D. G. AND McMAHON, B. R. (1982). The influence of experimental anaemia on blood acid–base regulation *in vivo* and *in vitro* in the starry flounder (*Platichthys stellatus*) and the rainbow trout (*Salmo gairdneri*). *J. exp. Biol.* **96**, 221–237.
- WOOD, C. M. AND PERRY, S. F. (1985). Respiratory, circulatory, and metabolic adjustments to exercise in fish. In *Circulation, Respiration, Metabolism* (ed. R. Gilles), pp. 2–22. Berlin: Springer-Verlag.
- WOOD, C. M., WALSH, P. J., THOMAS, S. AND PERRY, S. F. (1990). Control of red blood cell metabolism in rainbow trout after exhaustive exercise. *J. exp. Biol.* **154**, 491–507.
- WOODWARD, J. J. (1982). Plasma catecholamines in resting rainbow trout, *Salmo gairdneri*, by high pressure liquid chromatography. *J. Fish Biol.* **21**, 429–432.
- WRIGHT, P., HEMING, T. AND RANDALL, D. J. (1986). Downstream pH changes in water flowing over the gills of rainbow trout. *J. exp. Biol.* **126**, 499–512.
- ZEIDLER, R. AND KIM, D. H. (1977). Preferential hemolysis of postnatal calf red cells induced by internal alkalization. *J. gen. Physiol.* **70**, 385–401.
